# Supplementary material
Source: publisher figshare collection journal article supplement (https://tandf.figshare.com/ndownloader/files/13585010)
Supplement: Supplementary file 1 [file 13585010]

**Supporting Information**

**Montmorillonite K 10 catalyzed highly regioselective azidolysis of epoxides: a short and efficient synthesis of phenylglycine**

Keshab Ch Ghosha, Isita Banerjeea and Surajit Sinhaa,*

aDepartment of Organic Chemistry, Indian Association for the Cultivation of Science, Jadavpur, Kolkata 700 032, India, [*ocss5@iacs.res.in](mailto:*ocss5@iacs.res.in)

| **Table of Contents** | |
| --- | --- |
| Experimental Procedure | S2-S15 |
| NMR spectra | S16-S54 |
| References | S55-S57 |

**Experimental Procedure:**

**General:**

All reagents were purchased from commercial sources and used without further purification, unless otherwise stated. Petroleum ether (PE) refers to the fraction of petroleum boiling between 60–80 °C. The following abbreviations are used for CbzCl = Benzyl chloroformate, MsCl = Methanesulfonyl chloride, DBU = 1,8-Diazabicyclo[5.4.0]undec-7-ene, MeOH = methanol, TBDPSCl = *tert*-Butyldiphenylchlorosilane, DMAP = 4-Dimethylaminopyridine, IBX = 2-iodoxybenzoic acid, THF = Tetrahydrofuran, DMF= Dimethylformamide, DCM = dichloromethane, EtOAc = ethyl acetate. All the reactions were carried out in oven-dried glassware under an argon atmosphere using anhydrous solvents, standard syringe and septum techniques unless otherwise indicated. Organic extracts were dried over anhydrous Na2SO4 and then filtered prior to removal of all volatiles under reduced pressure on rotary evaporation. Chromatographic purification of products was accomplished using column chromatography on silica gels (mesh 100 ~ 200). Thin-layer chromatography (TLC) was carried out on aluminium sheets, Silica Gel 60 F254 (Merck; layer thickness 0.25 mm). Visualization of the developed chromatogram was performed by UV light and /or ninhydrin, CAM stains. IR spectra were recorded as thin films (for liquids). 1H and 13C NMR spectra were recorded at 300, 400 or 500 MHz and 75, 100 or 125 MHz, respectively using CDCl3 as solvent. Chemical shifts (δ) are given in ppm relative to the solvent residual peak or TMS as internal standard. The following abbreviations are used for multiplicity of NMR signals: s = singlet, d = doublet, t = triplet, m = multiplet, br = broad. High Resolution Mass Spectra (HRMS) were measured in a QTOF I (quadrupole-hexapole-TOF) mass spectrometer with an orthogonal Z-spray-electrospray interface on Micro (YA-263) mass spectrometer (Manchester, UK).

**Synthesis of Starting materials:**

The starting materials were synthesized according to literature procedure. [[[1]](#endnote-2)] All the spectral data were consistent with data reported in the literature.

**2-(3-Nitrophenyl)oxirane (4).**[1a, [[2]](#endnote-3)]Powdered mCPBA (278 mg, 1.61 mmol) was added for. 10 min. to a stirred heterogeneous aqueous mixture of NaHCO3 (0.3 N, 15 ml) and 3-nitrostyrene (200 mg, 1.34 mmol) cooled at 0°C. The suspension was vigorously stirred at room temperature for 2 h and then extracted twice with ethyl ether. The organic phase was washed with a cooled solution of 10% NaOH, then with saturated brine and dried over Na2SO4. The solvent was removed under reduced pressure and the crude compound was purified by column chromatography using EtOAc/petroleum ether (1 : 9) on silica gel to afford **4** as a colorless oil (137 mg, 62% yield). 1H NMR (400 MHz, CDCl3) δ 8.15 (d, *J* = 7.6 Hz, 2H), 7.61 (d, *J* = 8 Hz, 1H), 7.53 (t, *J* = 8 Hz, 1H), 3.96 (dd, *J* = 4, 2.4 Hz, 1H), 3.21 (m, 1H), 2.80 (dd, *J* = 5.6, 2.4 Hz, 1H); 13C NMR (100 MHz, CDCl3) δ 148.9, 140.2, 131.6, 129.7, 123.2, 120.7, 51.5.

**2-((Benzyloxy)methyl)oxirane (5).**[1b-c, [[3]](#endnote-4)]A mixture of 40% w/w aqueous sodium hydroxide (10 mL), benzyl alcohol (649 mg, 6 mmol), TBAB (97 mg, 0.3 mmol) was vigorously stirred at room temperature and placed in an ice bath. Epichlorohydrin (1.88 mL, 24 mmol) was gradually added over 20 min. The reaction was stirred for 24 h. The reaction mixture poured on ice/water (10 mL). The aqueous phase was extracted with diethyl ether (2 x 20 mL). The combined organic phase was washed with brine, dried Na2SO4, concentrated to give crude compound which was purified by column chromatography using EtOAc/petroleum ether (15 : 85) on silica gel to afford **5** as a colorless oil (740 mg, 75% yield. 1H NMR (300 MHz, CDCl3) δ 7.34 - 7.23 (m, 5H), 4.56 (ABq, *J* = 12 Hz, 2H), 3.74 (dd, *J* = 11.4, 3.0 Hz, 1H), 3.42 (dd, *J* = 11.4, 5.7 Hz, 1H), 3.16 (ddt, *J* = 5.7, 4.2, 2.7 Hz, 1H), 2.77 (dd, *J* = 5.1, 4.2 Hz, 1H), 2.59 (dd, *J* = 5.1, 2.7 Hz, 1H); 13C NMR (75 MHz, CDCl3) δ 137.9, 128.4, 127.8, 73.3, 70.8, 50.8, 44.2.

**2-(Phenoxymethyl)oxirane (6).**[1e, [[4]](#endnote-5)]To a stirred solution of phenol (1 g, 10.62 mmol) in 15 ml ethanol was added NaOH (510 mg, 12.74 mmol). After stirring for 20 min at RT, epichlorohydrin (3.33 mL, 42.5 mmol) was added dropwise for 30 min. The resulting mixture was stirred at RT for 9h. After completion of reaction, solvent was removed under reduced pressure, added water (20 mL) and extracted twice with EtOAc. The organic phases were combined and washed with water, brine, dried over Na2SO4, concentrated to give crude product. Crude product was purified by column chromatography using EtOAc/pet ether (1 : 9) on silica gel to afford **6** as a colorless oil (1.12 g, 70% yield) 1H NMR (300 MHz, CDCl3) δ 7.29 - 7.21 (m, 2H), 6.97 - 6.87 (m, 3H), 4.17 (dd, *J* = 11.1, 3 Hz, 1H), 3.90 (dd, *J* = 11.1, 5.7 Hz, 1H), 3.30 (ddt, *J* = 5.7, 4.2, 3 Hz, 1H), 2.84 (dd, *J* = 5.1, 4.2 Hz, 1H), 2.70 (dd, *J* = 5.1, 2.7 Hz, 1H); 13C NMR (75 MHz, CDCl3) δ 158.5, 129.5, 121.2, 114.6, 68.7, 50.1, 44.6.

**2-((4-Nitrophenoxy)methyl)oxirane (7).**[4]To a mixture of epichlorohydrin (556 μL, 7.10 mmol) and 4-nitrophenol (395 mg, 2.84 mmol) in DMF (10 ml) was added K2CO3 (471 mg, 3.41 mmol). The mixture was stirred for 18 hours at RT. The reaction mixture was diluted with EtOAc (25 ml), washed successively with water and brine, dried over Na2SO4 and concentrated. The residue was purified by column chromatography using ethyl acetate-petroleum ether (15 : 85) on silica gel to afford the product **7** as a white solid (360 mg, 65% yield). 1H NMR (300 MHz, CDCl3) δ 8.17 - 8.12 (m, 2H), 6.98 - 6.93 (m, 2H), 4.37 (dd, *J* = 11.1, 2.7 Hz, 1H), 3.97 (dd, *J* = 11.1, 6.0 Hz, 1H), 3.35 (ddt, *J* = 5.4, 4.2, 2.7 Hz, 1H), 2.91(t, *J* = 4.5, 1H), 2.75 (dd, *J* = 4.8, 2.7 Hz, 1H); 13C NMR (75 MHz, CDCl3) δ 163.4, 141.8, 125.9, 114.7, 69.5, 49.8, 44.4.

**2-((4-Fluorophenoxy)methyl)oxirane (8).**[4]To a mixture of epichlorohydrin (639 μL, 8.16 mmol) and 4-fluorophenol (183 mg, 1.63 mmol) in acetonitrile (10 ml) was added K2CO3 (451.1 mg, 3.26 mmol). The mixture was heated at reflux for 3 hours. The solvent was evaporated, added water (20 mL) and extracted twice with EtOAc. The organic phases were combined and washed with water, brine, dried over Na2SO4, concentrated to give crude product. Crude product was purified by column chromatography using EtOAc/pet ether (1 : 9) on silica gel to afford **8** as a colorless solid (223 mg, 81% yield). 1H NMR (300 MHz, CDCl3) δ 6.99 - 6.92 (m, 2H), 6.88 - 6.82 (m, 2H), 4.18 (dd, *J* = 11.1, 3.0 Hz, 1H), 3.88 (dd, *J* = 11.1, 5.7 Hz, 1H), 3.32 (ddd, *J* = 6.9, 5.7, 2.7 Hz, 1H), 2.88 (t, *J* = 4.5, 1H), 2.72 (dd, *J* = 5.1, 2.7 Hz, 1H); 13C NMR (75 MHz, CDCl3) δ 159.2, 156.0, 154.7, 116.1, 115.9, 115.8, 69.5, 50.2, 44.6.

**2-((4-Methoxyphenoxy)methyl)oxirane (9).**[[[5]](#endnote-6)] **9** was synthesized from compound 4-methoxyphenol, following the same procedure as of **6**. (520 mg, 77% yield).1H NMR (300 MHz, CDCl3) δ 6.89 - 6.81 (m, 4H), 4.16 (dd, *J* = 11.1, 3.3 Hz, 1H), 3.91 (dd, *J* = 11.1, 5.7 Hz, 1H), 3.76 (s, 3H), 3.33 (ddd, *J* = 6.9, 5.7, 3.0 Hz, 1H), 2.89 (dd, *J* = 5.1, 4.2 Hz, 1H), 2.74 (dd, *J* = 5.1, 2.7 Hz, 1H); 13C NMR (75 MHz, CDCl3) δ 154.3, 152.8, 115.9, 114.8, 69.7, 55.8, 50.4, 44.8.

**2-((3,4-Dimethylphenoxy)methyl)oxirane (10). 10** was synthesized from compound 3,4-dimethylphenol, following the same procedure as of **6**. (457 mg, 57% yield).1H NMR (300 MHz, CDCl3) δ 6.95 (d, *J* = 10.8 Hz, 2H), 6.72 (d, *J* = 8.1 Hz, 1H), 4.20 (dd, *J* = 11.1, 3.3 Hz, 1H), 3.96 (dd, *J* = 11.1, 5.4 Hz, 1H), 3.36 (m, 1H), 2.90 (t, *J* = 4.5 Hz, 1H), 2.78 (dd, *J* = 5.1, 2.7 Hz, 1H), 2.27 (s, 3H), 2.23 (s, 3H); 13C NMR (75 MHz, CDCl3) δ 154.7, 131.8, 130.3, 127.1, 127.0, 111.6, 69.1, 50.5, 44.8, 20.6, 16.2; HRMS (ESI): *m*/*z* [M+Na]+ calcd for C11H14O2Na: 201.0892; found 201.0894.

**2-((Cyclohex-3-en-1-ylmethoxy)methyl)oxirane (11).** 3-Cyclohexene-1-methanol (1 g, 8.91 mmol) was added dropwise to a stirred mixture of 50% aqueous sodium hydroxide (12 mL), epichlorohydrin (3.3 mL, 35.66 mmol,), and TBAB (290 mg, 0.89 mmol) at 0°C. After a reaction period of 16 hours, the mixture was poured into water (20 mL), and the aqueous medium was extracted with EtOAc The organic layer was washed with water, dried over Na2SO4 and concentrated to give crude compound. Crude product was purified by column chromatography using EtOAc/petroleum ether (1 : 9) on silica gel to afford **11** as a colorless oil (1.2 g, 80% yield). 1H NMR (500 MHz, CDCl3) δ 5.67 - 5.62 (m, 2H), 3.71 (dd, *J* = 11.7, 3.0 Hz, 1H), 3.42 - 3.32 (m, 3H), 3.13 (m, 1H), 2.78 (t, *J* = 4.5 Hz, 1H), 2.59 (dd, *J* = 5.1, 2.7 Hz, 1H), 2.09 (m, 1H), 2.05 - 2.02 (m, 2H), 1.89 (m, 1H), 1.80(m, 1H), 1.71 (m, 1H), 1.26 (m, 1H); 13C NMR (125 MHz, CDCl3) δ 127.2, 126.0, 76.6, 71.8 , 51.0, 44.4, 34.0, 28.6, 25.7, 24.6; HRMS (ESI): *m*/*z* [M+Na]+ calcd for C10H16O2Na: 191.1048; found 191.1045.

**2-((Prop-2-yn-1-yloxy)methyl)oxirane (12).**[1g,, [[6]](#endnote-7)]To a solution ofpropargyl alcohol (1 mL, 17 mmol) in a mixture of 10 mL benzene and 10 mL of a 50% NaOH was added TBAB (550 mg, 1.7 mmol). The mixture was cooled to 0°C and epichlorohydrine (4 mL, 51 mmol) was added dropwise. The reaction was vigorously stirred at room temperature for 24 h, diluted with ether and washed with water and brine, and finally dried over Na2SO4. Solvent was removed in vacuo and the crude product was purified by column chromatography using EtOAc/petroleum ether (2 : 8) on silica gel to afford **12** as a colorless oil (540 mg, 31% yield). 1H NMR (500 MHz, CDCl3) δ 4.19 - 4.11 (m, 2H), 3.76 (dd, *J* = 11.4, 3 Hz, 1H), 3.41 (dd, *J* = 11.4, 6 Hz, 1H), 3.11 (dt, *J* = 6, 2.7 Hz, 1H), 2.74 (t, *J* = 4.5 Hz, 1H), 2.57 (dd, *J* = 5.1, 2.4 Hz, 1H), 2.42 (m, 1H); 13C NMR (125 MHz, CDCl3) δ 79.3, 74.8, 70.3, 58.4, 50.4, 44.2.

**5-(Oxiran-2-ylmethoxy)-1H-indole (13).** To a stirred solution of 5-hydroxyindole (365 mg, 2.74 mmol) and TBAB (88.4 mg, 0.27 mmol) in 5 ml 20% NaOH, was added epichlorohydrin (644 μL, 8.22 mmol) dropwise at 10°C. The resulting mixture was stirred at 60°C for 2h. After completion of reaction, the mixture was poured into water (10 mL), and the aqueous medium was extracted with EtOAc The organic layer was washed with water, dried over Na2SO4 and concentrated to give crude compound. Crude product was purified by column chromatography using EtOAc/ petroleum ether (3:7) on silica gel to afford **13** as a white solid (204 mg, 40% yield). 1H NMR (300 MHz, CDCl3) δ 8.31 (s, 1H), 7.36 (d, *J* = 8.7 Hz, 1H), 7.24 (d, *J* = 2.7 Hz, 2H), 7.01 (dd, *J* = 8.7, 2.4 Hz, 1H), 6.58 (m, 1H), 4.36 (dd, *J* = 11.1, 3.3 Hz, 1H), 4.11 (dd, *J* = 11.1, 5.7 Hz, 1H), 3.50 (ddt, *J* = 5.7, 3.9, 3.0 Hz, 1H), 3.01 (t, *J* = 4.5 Hz, 1H), 2.89 (dd, *J* = 4.8, 2.7 Hz, 1H); 13C NMR (75 MHz, CDCl3) δ 153.1, 131.4, 128.3, 125.3, 112.8, 111.9, 104.0, 102.3, 69.8, 50.6, 44.9; HRMS (ESI): *m*/*z* [M+Na]+ calcd for C11H11NO2Na: 190.0859; found 190.0862.

**General method for epoxide ring opening:**

To a mixture of epoxide (1 equiv) and NaN3 (1.5 equiv) in CH3CN-H2O (8:2, 10 mL) Montmorillonite K 10 (5% w/w) was added. The reaction mixture was stirred at 80°C for a specified time as required to complete the reaction. After completion as indicated by TLC, the reaction mixture was then filtered, the filter pad was washed with CH3CN and the combined filtrates were evaporated. The reaction mixture was extracted with EtOAc, the combined organic layers were washed with H2O and brine, dried over anhydrous Na2SO4, and evaporated under reduced pressure. The crude product was then purified by column chromatography over silica gel using EtOAc/petroleum ether as eluent to provide the pure azido alcohol. Characterization data of all the products are shown below.

**(1S,2S)-2-Azidocyclohexanol (1a):** [[[7]](#endnote-8)] Isolated yield: 324 mg (85%); colorless oil; 1H NMR (300 MHz, CDCl3) δ 3.36 (td, *J* = 9.6, 4.5 Hz, 1H), 3.16 (m, 1H), 2.63 (s, 1H), 2.06 - 1.96 (m, 2H), 1.80 - 1.66 (m, 2H), 1.38 - 1.19 (m, 4H); 13C NMR (75 MHz, CDCl3) δ 73.6, 67.2, 33.1, 29.8, 24.3, 23.9; IR (Neat) *ν*max 3390, 3365, 2937, 2862, 2096, 1452 cm-1.

**1-Azido-3-chloropropan-2-ol (2a):** [[[8]](#endnote-9)] Isolated yield: 695 mg (94%); colorless liquid;1H NMR (500 MHz, CDCl3) δ 3.99 (t, *J* = 6.0 Hz, 1H), 3.64 - 3.57 (m, 2H), 3.47 (d, *J* = 5.4 Hz, 2H), 2.59 (s, 1H); 13C NMR (125 MHz, CDCl3) δ 70.5, 53.6, 46.5; IR (Neat) *ν*max 3417, 3018, 2929, 2108, 1616 cm-1.

**2-Azido-1-phenylethanol (3b):** [[[9]](#endnote-10)].Isolated yield: 104 mg (15%); colorless oil; 1H NMR (300 MHz, CDCl3) δ 7.42 - 7.31 (m, 5H), 4.89 (t, *J* = 6.3 Hz, 1H), 3.54 – 3.41 (m, 2H), 2.35 (s, 1H); 13C NMR (75 MHz, CDCl3) δ 140.7, 128.9, 128.6, 126.1, 73.6, 58.3; IR (Neat) *ν*max 3383, 3014, 2925, 2102, 1492, 1454 cm-1.

**2-Azido-2-(3-nitrophenyl)ethanol (4a):** Isolated yield: 28.3 mg (67%); colorless oil; 1H NMR (300 MHz, CDCl3) δ 8.24 - 8.20 (m, 2H), 7.70 (dt, *J* = 7.8, 1.5 Hz, 1H), 7.59 (td, *J* = 7.5, 1.2 Hz, 1H), 4.80 (dd, *J* = 7.5, 4.5 Hz, 1H), 3.87 - 3.75 (m, 2H), 2.08 (s, 1H); 13C NMR (75 MHz, CDCl3) δ 148.7, 138.9, 133.3, 130.1, 123.7, 122.4, 66.8, 66.5; IR (Neat) *ν*max 3365, 2923, 2102, 1527, 1352 cm-1; HRMS (ESI): *m*/*z* [M+Na]+ calcd for C8H8N4O3Na: 231.0494; found: 231.0491.

**2-Azido-1-(3-nitrophenyl)ethanol (4b):** Isolated yield: 7.2 mg (17%); colorless oil; 1H NMR (300 MHz, CDCl3) δ 8.26 (t, *J* = 2.1 Hz, 1H), 8.17 (ddd, *J* = 8.1, 2.4, 1.2 Hz, 1H), 7.73 (d, *J* = 7.8 Hz, 1H), 7.56 (t, *J* = 7.8 Hz, 1H), 5.00 (dd, *J* = 7.2, 4.5 Hz, 1H), 3.58 - 3.46 (m, 2H), 2.79 (s, 1H); 13C NMR (75 MHz, CDCl3) δ 148.6, 142.8, 132.2, 129.8, 123.3, 121.2, 72.4, 58.0; IR (Neat) *ν*max 3434, 2923, 2108, 1529, 1352 cm-1.

**1-Azido-3-(benzyloxy)propan-2-ol (5a):** [[[10]](#endnote-11)] Isolated yield: 186.5 mg (91%); colorless oil; 1H NMR (300 MHz, CDCl3) δ 7.41 - 7.29 (m, 5H), 4.55 (s, 2H), 3.95 (p, *J* = 5.4 Hz, 1H), 3.55 - 3.46 (m, 2H), 3.40 - 3.30 (m, 2H), 2.97 (s, 1H); 13C NMR (75 MHz, CDCl3) δ 137.6, 128.5, 128.0, 127.8, 73.5, 71.4, 69.6, 53.5; IR (Neat) *ν*max 3442, 2921, 2866, 2102, 1454, 1286 cm-1; HRMS (ESI): *m*/*z* [M+Na]+ calcd for C10H13N3O2Na: 230.0905; found: 230.0903.

**1-Azido-3-phenoxypropan-2-ol (6a):** [10] Isolated yield: 329.4 mg (95%); colorless oil; 1H NMR (300 MHz, CDCl3) δ 7.32 (t, *J* = 7.8 Hz, 2H), 7.01 (t, *J* = 7.5 Hz, 1H), 6.93 (d, *J* = 8.1 Hz, 2H), 4.17 (h, *J* = 5.1 Hz, 1H), 4.01 (d, *J* = 5.4 Hz, 2H), 3.57 - 3.46 (m, 2H), 2.92 (s, 1H); 13C NMR (75 MHz, CDCl3) δ 158.3, 129.7, 121.5, 114.6, 69.4, 69.1, 53.5; IR (Neat) *ν*max 3431, 2931, 2104, 1599, 1496 cm-1; HRMS (ESI): *m*/*z* [M+Na]+ calcd for C9H11N3O2Na: 216.0749; found: 216.0748.

**1-Azido-3-(4-nitrophenoxy)propan-2-ol (7a):** Isolated yield: 95 mg (86%); white solid; 1H NMR (300 MHz, CDCl3) δ 8.17 - 8.12 (m, 2H), 6.98 - 6.93 (m, 2H), 4.21 (q, *J* = 5.1 Hz, 1H), 4.10 (d, *J* = 5.1 Hz, 2H), 3.81 - 3.48 (m, 2H), 2.91 (d, *J* = 5.1 Hz, 1H); 13C NMR (75 MHz, CDCl3) δ 163.3, 141.9, 126.0, 114.6, 69.8, 69.0, 53.3; IR (Neat) *ν*max 3454, 2933, 2104, 1593, 1514, 1498, 1346 cm-1.

**2-Azido-3-(4-nitrophenoxy)propan-1-ol (7b):** Isolated yield: 5.5 mg (5%); white solid; 1H NMR (300 MHz, CDCl3) δ 8.24 - 8.19 (m, 2H), 7.09 - 7.03 (m, 2H), 4.62 (p, *J* = 5.1 Hz, 1H), 3.96 - 3.88 (m, 2H), 3.62 (d, *J* = 5.4 Hz, 2H), 1.93 (s, 1H); 13C NMR (75 MHz, CDCl3) δ 162.6, 142.3, 126.2, 115.8, 78.2, 62.0, 51.0; IR (Neat) *ν*max 3433, 2925, 2102, 1591, 1510, 1344 cm-1.

**1-Azido-3-(4-fluorophenoxy)propan-2-ol (8a):** Isolated yield: 132 mg (96%); white solid; 1H NMR (300 MHz, CDCl3) δ 7.01 - 6.93 (m, 2H), 6.87 - 6.80 (m, 2H), 4.14 (m, 1H), 3.96 (d, *J* = 5.1 Hz, 2H), 3.56 - 3.44 (m, 2H), 2.88 (s, 1H); 13C NMR (75 MHz, CDCl3) δ 159.2, 156.1, 154.44, 154.41, 116.2, 115.9, 115.8, 115.6, 69.8, 69.3, 53.4; IR (Neat) *ν*max 2931, 2104, 1506, 1209 cm-1; HRMS (ESI): *m*/*z* [M+Na]+ calcd for C9H10N3O2FNa: 234.0655; found: 234.0656.

**1-Azido-3-(4-methoxyphenoxy)propan-2-ol (9a):** Isolated yield: 222 mg (98%); white solid; 1H NMR (300 MHz, CDCl3) δ 6.87 - 6.81 (m, 4H), 4.14 (p, *J* = 5.4 Hz, 1H), 4.0 - 3.91 (m, 2H), 3.77 (s, 3H), 3.56 - 3.44 (m, 2H), 2.71 (s, 1H); 13C NMR (75 MHz, CDCl3) δ 154.4, 152.5, 115.7, 114.9, 70.0, 69.5, 55.8, 53.5; IR (Neat) *ν*max 3435, 2933, 2104, 1508, 1230 cm-1; HRMS (ESI): *m*/*z* [M+Na]+ calcd for C10H13N3O3Na: 246.0855; found: 246.0857.

**1-Azido-3-(3,4-dimethylphenoxy)propan-2-ol (10a):** Isolated yield: 222 mg (98%); white solid; 1H NMR (300 MHz, CDCl3) δ 6.96 (d, *J* = 8.1 Hz, 2H), 6.72 (d, *J* = 7.8 Hz, 1H), 4.19 (h, *J* = 5.1 Hz, 1H), 3.99 (d, *J* = 5.1 Hz, 2H), 3.59 - 3.48 (m, 2H), 2.53 (d, *J* = 5.1 Hz, 1H), 2.27 (s, 3H), 2.21 (s, 3H); 13C NMR (75 MHz, CDCl3) δ 154.3, 131.8, 130.6, 127.2, 126.6, 111.5, 69.7, 69.4, 53.7, 20.5, 16.2; IR (Neat) *ν*max 3429, 2924, 2104, 1504, 1255 cm-1; HRMS (ESI): *m*/*z* [M+Na]+ calcd for C11H15N3O4Na: 244.1062; found: 244.1064.

**1-Azido-3-(cyclohex-3-en-1-ylmethoxy)propan-2-ol (11a):** Isolated yield: 450 mg (95%); colorless oil; 1H NMR (300 MHz, CDCl3) δ 5.70 - 5.60 (m, 2H), 3.92 (m, 1H), 3.49 - 3.40 (m, 2H), 3.39 - 3.30 (m, 4H), 2.55 (s, 1H), 2.11 - 2.01 (m, 3H), 1.89 (m, 1H), 1.81 - 1.65 (m, 2H), 1.26 (m, 1H); 13C NMR (75 MHz, CDCl3) δ 127.2, 125.9, 76.6, 72.1, 69.7, 53.6, 33.8, 28.5, 25.6, 24.6; IR (Neat) *ν*max 3409, 3022, 2916, 2102, 1436, 1278, 1130 cm-1; HRMS (ESI): *m*/*z* [M+Na]+ calcd for C10H17N3O2Na: 234.1218; found: 234.1219.

**1-Azido-3-(prop-2-yn-1-yloxy)propan-2-ol (12a):** [[[11]](#endnote-12)] Isolated yield: 248 mg (92%); colorless oil; 1H NMR (300 MHz, CDCl3) δ 4.18 (d, *J* = 2.4 Hz, 2H), 3.95 (tt, *J* = 6.0, 4.5 Hz, 1H), 3.61 - 3.51 (m, 2H), 3.42 - 3.31 (m, 2H), 2.74 (s, 1H), 2.47 (t, *J* = 2.4 Hz, 1H); 13C NMR (75 MHz, CDCl3) δ 79.2, 75.2, 71.2, 69.6, 58.7, 53.5; IR (Neat) *ν*max 3585, 3307, 3018, 2106, 1215 cm-1.

**1-((1H-Indol-5-yl)oxy)-3-azidopropan-2-ol (13a):** Isolated yield: 238 mg (97%); yellow solid; 1H NMR (300 MHz, CDCl3) δ 8.15 (s, 1H), 7.23 (d, *J* = 9.6 Hz, 1H), 7.14 (t, *J* = 3 Hz, 1H), 7.09 (d, *J* = 2.4 Hz, 1H), 6.84 (dd, *J* = 8.7, 2.4 Hz, 1H), 6.45(m, 1H), 4.13 (m, 1H), 4.03 - 3.95 (m, 2H), 3.52 - 3.41 (m, 2H), 2.77 (s, 1H); 13C NMR (75 MHz, CDCl3) δ 152.6, 131.4, 128.2, 125.5, 112.5, 111.9, 103.9, 102.1, 70.1, 69.5, 53.4; IR (Neat) *ν*max 3411, 2925, 2104, 1622, 1581, 1479, 1454, 1284 cm-1; HRMS (ESI): *m*/*z* [M+Na]+ calcd for C11H12N4O2Na: 255.0858; found: 255.0857.

**(1S,3R,4R,5S)-Methyl 4-azido-3-((tert-butyldiphenylsilyl)oxy)-5-hydroxycyclohexanecarboxylate (14a):** Isolated yield: 22.1 mg (39%); white solid; 1H NMR (500 MHz, CDCl3) δ 7.72 - 7.67 (m, 4H), 7.47 - 7.38 (m, 6H), 4.22 (s, 1H), 3.74 (m, 1H), 3.65 (s, 3H), 3.31 (td, *J* = 9, 3 Hz, 1H), 2.91 (tt, *J* = 12.5, 4 Hz, 1H), 2.28 (dq, *J* = 13.5, 4 Hz, 1H), 2.03 (d, *J* = 8.5 Hz, 1H), 1.89 (m, 1H), 1.48 (q, *J* = 12.5 Hz, 1H), 1.39 (t, *J* = 12.5 Hz, 1H), 1.12 (s, 9H); 13C NMR (125 MHz, CDCl3) δ 174.6, 136.0, 133.3, 133.0, 130.3, 128.0, 75.6, 71.4, 61.7, 52.0, 36.0, 33.9, 32.3, 27.3, 19.6; IR (Neat) *ν*max 3789, 3018, 2931, 2104, 1724, 1585,1217 cm-1; HRMS (ESI): *m*/*z* [M+Na]+ calcd for C24H31N3O4SiNa: 476.1982; found: 476.1980.

**(1S,3S,4R,5R)-Methyl 3-azido-5-((tert-butyldiphenylsilyl)oxy)-4-hydroxycyclohexanecarboxylate (14b):** Isolated yield: 12.4 mg (22%); white solid; 1H NMR (300 MHz, CDCl3) δ 7.73 - 7.68 (m, 4H), 7.49 - 7.37 (m, 6H), 3.75 - 3.66 (m, 2H), 3.64 (s, 3H), 3.45 (dd, *J* = 9.6, 3 Hz, 1H), 2.84 (tt, *J* = 12.6, 3.6 Hz, 1H), 2.39 (s, 1H), 2.24 (m, 1H), 2.04 (dq, *J* = 14.2, 3.6 Hz, 1H), 1.40 - 1.29 (m, 2H), 1.11 (s, 9H); 13C NMR (75 MHz, CDCl3) δ 174.8, 136.0, 135.9, 133.5, 132.9, 130.3, 130.1, 128.1, 127.9, 76.5, 69.1, 61.6, 52.0, 35.6, 32.7, 32.3, 27.2, 19.5; IR (Neat) *ν*max 3365, 2931, 2106, 1734, 1109 cm-1; HRMS (ESI): *m*/*z* [M+Na]+ calcd for C24H31N3O4SiNa: 476.1982; found: 476.1984.

**(3aR,5S,7R,7aS)-Methyl 7-hydroxy-2,2-dimethylhexahydrobenzo[d][1,3]dioxole-5-carboxylate (16):** [[[12]](#endnote-13)] Sodium methoxide (440 mg, 8.14 mmol) in methanol (10 mL) was added to a solution containing **15**[[[13]](#endnote-14)] (1.07 g, 5.40 mmol) in dry MeOH (15 mL) at 0 °C. The reaction mixture was stirred at 0 °C for 1 h then at room temperature for a period of 4 h. The reaction mixture was neutralized by adding acetic acid at 0 °C. Methanol was evaporated to dryness. The reaction mixture was diluted with EtOAc (20 mL), washed successively with water and brine, dried over Na2SO4 and concentrated. The residue was purified by column chromatography using EtOAc-petroleum ether (1:1) on silica gel to afford the product **16** as a white solid (970 mg, 78% yield). 1H NMR (500 MHz, CDCl3) δ 4.34 (d, *J* = 5.8 Hz, 1H), 3.82 (t, *J* = 7 Hz 1H), 3.75 - 3.71 (m, 1H), 3.68 (s, 3H), 2.71 (td, *J* = 12.3, 4.0 Hz, 2H), 2.31(m, 1H), 2.12 (m, 1H), 1.85 (ddd, *J* = 15.7, 12.2, 4.0 Hz, 1H), 1.47 (s, 3H), 1.44 (m, 1H), 1.34 (s, 3H); 13C NMR (125 MHz, CDCl3) δ 175.4, 109.0, 80.5, 73.6, 71.7, 52.1, 36.2, 32.7, 28.9, 28.4, 26.2; IR (Neat) *ν*max 3446, 2935, 1734, 1220, 1058 cm-1; HRMS (ESI): *m*/*z* [M+Na]+ calcd for C11H18O5Na: 253.1052; found 253.1054.

**(3aR,5R,7R,7aR)-methyl 2,2-dimethyl-7-((methylsulfonyl)oxy)hexahydrobenzo[d][1,3]dioxole-5-carboxylate (17):** [12] To a solution of **16** (565 mg, 2.45 mmol) in dry DCM (10 mL) was added Et3N (0.86 mL, 6.13 mmol). Mesylchloride (0.25 mL, 3.19 mmol) was added dropwise at 0 °C. The reaction mixture was stirred at 0 °C for a period of 1.5 h. After completion of the reaction it was diluted with DCM (20 mL), washed with water, brine. Organic layer was dried over Na2SO4, concentrated *in vaccuo* and purified by column chromatography using EtOAc-petroleum ether (3:7) on silica gel to obtain compound **17** as colorless solid (665 mg, 88% yield). 1H NMR (400 MHz, CDCl3) δ 4.54 (ddd, *J* = 12.1, 7.5, 4.7 Hz, 1H), 4.34 (dt, *J* = 5.2, 2.2 Hz, 1H), 3.94 (dd, *J* = 7.5, 5.2 Hz, 1H), 3.61 (s, 3H), 3.05 (s, 3H), 2.71 (tt, *J* = 12.5, 3.3 Hz, 1H), 2.32 - 2.25 (m, 2H), 1.77 (ddd, *J* = 15.7, 12.7, 3.8 Hz, 1H), 1.58 (q, *J* = 12.4 Hz, 1H), 1.45 (s, 3H), 1.28 (s, 3H); 13C NMR (100 MHz, CDCl3) δ 173.9, 109.7, 82.9, 77.4, 74.0, 52.2, 38.8, 36.1, 32.6, 28.9, 28.2, 26.2; IR (Neat) *ν*max 2985, 1734, 1356, 1174, 931, 819 cm-1; HRMS (ESI): *m*/*z* [M+Na]+ calcd for C12H20O7SNa: 331.0827; found 331.0825.

**(1R,3R,4R,5R)-methyl 3,4-dihydroxy-5-((methylsulfonyl)oxy)cyclohexanecarboxylate (18):** [12] A suspension of **17** (500 mg, 1.62 mmol) in 80% aqueous acetic acid (10 mL) was stirred for 3 h at 60 °C. After cooling to rt, the solvents were removed by co-evaporation with toluene (3x20 mL). The residue was dried in high vacuum to give **18** as colorless solid (426 mg, 98% yield). 1H NMR (500 MHz, CDCl3) δ 4.85 (ddd, *J* = 11.7, 9.3, 5.1 Hz, 1H), 4.22 (m, 1H), 3.69 (s, 3H), 3.61 (d, *J* = 8.8 Hz, 1H), 3.11 (s, 3H), 3.08 (s, 1H), 2.95 (tt, *J* = 12.7, 3.5 Hz, 1H), 2.56 (s, 1H), 2.45 (m, 1H), 2.23 (dq, *J* = 14.3, 3.3 Hz, 1H), 1.73 (q, *J* = 12.6 Hz, 1H), 1.66 - 1.60 (m, 4H); 13C NMR (125 MHz, CDCl3) δ 174.4, 81.2, 73.5, 69.4, 52.2, 38.6, 35.7, 33.3, 32.8; IR (Neat) *ν*max 3527, 1734, 1327, 1167, 904 cm-1; HRMS (ESI): *m*/*z* [M+Na]+ calcd for C9H16O7SNa: 291.0515; found 291.0518.

**(1S,3R,5R,6R)-methyl 5-hydroxy-7-oxabicyclo[4.1.0]heptane-3-carboxylate (19):** [12] To a solution of compound **18** (420 mg, 1.56 mmol) in dry THF (10 mL) was added DBU (0.72 mL, 4.69 mmol). The reaction mixture was refluxed overnight at 70 °C. The reaction mixture was concentrated, diluted with EtOAc (30 mL). Organic layer was washed with brine (10 mL), dried over Na2SO4, concentrated *in* *vaccuo* and purified by column chromatography using EtOAc-petroleum ether (3:7) on silica gel to obtain compound **19** as colorless oil (199 mg, 74% yield). 1H NMR (500 MHz, CDCl3) δ 4.11 (s, 1H), 3.64 (s, 3H), 3.41 (s, 1H), 3.33 (t, *J* = 3.8 Hz, 1H), 2.63 (tt, *J* = 8.5, 4.1 Hz, 1H), 2.55 (m, 1H), 2.21 (dd, *J* = 15.2, 4.9 Hz, 1H), 1.95 (ddd, *J* = 15.2, 8.4, 2.4 Hz, 1H), 1.81 (dt, *J* = 13.8, 3.7 Hz, 1H), 1.64 (ddd, *J* = 14.2, 10.1, 5.2 Hz, 1H); 13C NMR (125 MHz, CDCl3) δ 175.4, 63.9, 54.8, 54.2, 52.0, 33.4, 32.3, 26.3; IR (Neat) *ν*max 3488, 2952, 1732, 1438, 1201, 1066 cm-1; HRMS (ESI): *m*/*z* [M+Na]+ calcd for C8H12O4Na: 195.0633; found 195.0636.

**(1S,3S,5R,6S)-Methyl 5-((tert-butyldiphenylsilyl)oxy)-7-oxabicyclo[4.1.0]heptane-3-carboxylate (14):** To a stirred solution of **19** (182 mg, 1.06 mmol) in dry DMF (5 ml) was added imidazole (216 mg, 3.17 mmol). After stirring for 5 min at 0°C, TBDPSCl (357 μL, 1.37 mmol) was added dropwise. The resulting mixture was stirred at RT for 9h. The reaction mixture was diluted with EtOAc (15 ml), washed successively with water and brine, dried over Na2SO4 and concentrated. The residue was purified by column chromatography using ethyl acetate-petroleum ether (1 : 9) on silica gel to afford the product **14** as a white solid (396 mg, 91% yield). 1H NMR (300 MHz, CDCl3) δ 7.75 (dd, *J* = 7.8, 1.8 Hz, 2H), 7.69 (dd, *J* = 7.8, 1.8 Hz, 2H), 7.47 - 7.36 (m, 6H), 4.04 (ddd, *J* = 7.8, 5.1, 3 Hz, 1H), 3.49 (s, 3H), 3.25 (m, 1H), 3.02 (t, *J* = 3.6 Hz, 1H), 2.71(m, 1H), 2.04 (dt, *J* = 5.1, 2.7 Hz, 2H), 1.90 (ddd, *J* = 13.2, 7.5, 3.6 Hz, 1H), 1.68 (ddd, *J* = 13.2, 7.2, 5.4 Hz, 1H), 1.09 (s, 9H); 13C NMR (75 MHz, CDCl3) δ 175.5, 135.9, 134.0, 133.9, 129.8, 127.8, 66.6, 54.8, 53.5, 51.9, 35.5, 31.2, 27.0, 25.5, 19.4; IR (Neat) *ν*max 2952, 2931, 2856, 1733, 1651, 1109 cm-1; HRMS (ESI): *m*/*z* [M+Na]+ calcd for C24H30O4SiNa: 433.1811; found 433.1814.

**2-Azido-2-phenylacetic acid (20):** [[[14]](#endnote-15)] To a solution of chromium trioxide (2.26 g, 22.61 mmol,) in 1.5M H2SO4 (10 ml), was added 2-azido-2-phenylethanol **3a** (870 mg, 5.95 mmol), dissolved in acetone (20 ml) at 0°C. The reaction mixture was then stirred whilst allowing the temperature to reach room temperature. After stirring the reaction mixture overnight, acetone was removed *in vacuo*. It was diluted with ether (30 ml) and the organic layer was extracted with 1M NaOH (15 ml). The aqueous layer was acidified with H2SO4 (1.5 M, 12 ml) and then extracted with EtOAc. The organic layer was separated, dried over anhydrous Na2SO4, and evaporated under reduced pressure. Crude product was purified by column chromatography using DCM-MeOH (97 : 3) on silica gel to afford **20** as a white solid (211 mg, 20%).1H NMR (300 MHz, CDCl3) δ 9.44 (s, 1H), 7.46 - 7.38 (m, 5H), 5.05 (s, 1H); 13C NMR (75 MHz, CDCl3) δ 174.6, 133.3, 129.8, 129.4, 127.8, 65.3; IR (Neat) *ν*max 3454, 3066, 2108, 1724, 1242 cm-1.

**Benzonitrile (21):**[[[15]](#endnote-16)] Isolated yield: 215 mg (35%); colorless oil; 1H NMR (300 MHz, CDCl3) δ 7.64 – 7.56 (m, 3H), 7.45 (t, *J* = 7.5 Hz, 2H); 13C NMR (75 MHz, CDCl3) δ 132.8, 132.1, 129.2, 118.8, 112.4; IR (Neat) *ν*max 3064, 2227, 1650, 1490 cm-1.

1H NMR of **4** (400 MHz, CDCl3).

13C NMR of **4** (100 MHz, CDCl3).

1H NMR of **5** (300 MHz, CDCl3).

13C NMR of **5** (75 MHz, CDCl3).

1H NMR of **6** (300 MHz, CDCl3).

13C NMR of **6** (75 MHz, CDCl3).

1H NMR of **7** (300 MHz, CDCl3).

13C NMR of **7** (75 MHz, CDCl3).

1H NMR of **8** (300 MHz, CDCl3).

13C NMR of **8** (75 MHz, CDCl3).

1H NMR of **9** (300 MHz, CDCl3).

13C NMR of **9** (75 MHz, CDCl3).

1H NMR of **10** (300 MHz, CDCl3).

13C NMR of **10** (75 MHz, CDCl3).

1H NMR of **11** (500 MHz, CDCl3).

13C NMR of **11** (125 MHz, CDCl3).

1H NMR of **12** (500 MHz, CDCl3).

13C NMR of **12** (125 MHz, CDCl3).

1H NMR of **13** (300 MHz, CDCl3).

13C NMR of **13** (75 MHz, CDCl3).

1H NMR of **16** (500 MHz, CDCl3).

13C NMR of **16** (125 MHz, CDCl3).

1H NMR of **17** (400 MHz, CDCl3).

13C NMR of **17** (100 MHz, CDCl3).

1H NMR of **18** (500 MHz, CDCl3).

13C NMR of **18** (125 MHz, CDCl3).

1H NMR of **19** (500 MHz, CDCl3).

13C NMR of **19** (125 MHz, CDCl3).

1H NMR of **14** (300 MHz, CDCl3).

13C NMR of **14** (75 MHz, CDCl3).

1H NMR of **1a** (300 MHz, CDCl3).

13C NMR of **1a** (75 MHz, CDCl3).

1H NMR of **2a** (500 MHz, CDCl3).

13C NMR of **2a** (125 MHz, CDCl3).

1H NMR of **3a** (300 MHz, CDCl3).

13C NMR of **3a** (75 MHz, CDCl3).

1H NMR of **3b** (300 MHz, CDCl3).

13C NMR of **3b** (75 MHz, CDCl3).

1H NMR of **4a** (300 MHz, CDCl3).

13C NMR of **4a** (75 MHz, CDCl3).

1H NMR of **4b** (300 MHz, CDCl3).

13C NMR of **4b** (75 MHz, CDCl3).

1H NMR of **5a** (300 MHz, CDCl3).

13C NMR of **5a** (75 MHz, CDCl3).

1H NMR of **6a** (300 MHz, CDCl3).

13C NMR of **6a** (75 MHz, CDCl3).

1H NMR of **7a** (300 MHz, CDCl3).

13C NMR of **7a** (75 MHz, CDCl3).

1H NMR of **7b** (300 MHz, CDCl3).

13C NMR of **7b** (75 MHz, CDCl3).

1H NMR of **8a** (300 MHz, CDCl3).

13C NMR of **8a** (75 MHz, CDCl3).

1H NMR of **9a** (300 MHz, CDCl3).

13C NMR of **9a** (75 MHz, CDCl3).

1H NMR of **10a** (300 MHz, CDCl3).

13C NMR of **10a** (75 MHz, CDCl3).

1H NMR of **11a** (300 MHz, CDCl3).

13C NMR of **11a** (75 MHz, CDCl3).

1H NMR of **12a** (300 MHz, CDCl3).

13C NMR of **12a** (75 MHz, CDCl3).

1H NMR of **13a** (300 MHz, CDCl3).

13C NMR of **13a** (75 MHz, CDCl3).

1H NMR of **14a** (500 MHz, CDCl3).

13C NMR of **14a** (125 MHz, CDCl3).

1H NMR of **14b** (300 MHz, CDCl3).

13C NMR of **14b** (75 MHz, CDCl3).

1H NMR of **20** (300 MHz, CDCl3).

13C NMR of **20** (75 MHz, CDCl3).

1H NMR of **21** (300 MHz, CDCl3).

13C NMR of **21** (75 MHz, CDCl3).

1H NMR of **22** (500 MHz, CDCl3).

13C NMR of **22** (125 MHz, CDCl3).

1H NMR of **23** (300 MHz, CDCl3).

13C NMR of **23** (75 MHz, CDCl3).

1H NMR of **24** (300 MHz, CDCl3).

13C NMR of **24** (75 MHz, CDCl3).

1H NMR of **25** (300 MHz, CDCl3).

13C NMR of **25** (75 MHz, CDCl3).

**References**

1. [?] (a) Fringuelli, F.; Germani, R.; Pizzo, F.; Savelli, G. Epoxidation reaction with m-chloroperoxybenzoic acid in water. *Tetrahedron Lett.* **1989**,*30*, 1427-1428. DOI: [10.1016/S0040-4039(00)99483-8](https://doi.org/10.1016/S0040-4039(00)99483-8). (b) de Almeida, C. G.; Reis, S. G.; de Almeida, A. M.; Diniz, C. G.; da Silva, V. L.; Le Hyaric, M. Synthesis and Antibacterial Activity of Aromatic and Heteroaromatic Amino Alcohols. *Chem. Biol. Drug Des.* **2011**, *78*, 876-880. DOI: [10.1111/j.1747-0285.2011.01231.x](https://doi.org/10.1111/j.1747-0285.2011.01231.x). (c) Sun, F.; Xu, G.; Wu, J.; Yang, L. Efficient lipase-catalyzed kinetic resolution of 4-arylmethoxy-3-hydroxybutanenitriles: application to an expedient synthesis of a statin intermediate. *Tetrahedron: Asymmetry* **2006**, *17*, 2907-2913. DOI: [10.1016/j.tetasy.2006.10.037](https://doi.org/10.1016/j.tetasy.2006.10.037). (d) Saikia, B.; Devi, T. J.; Barua, N. C. First total synthesis of Debilisone C. *Org. Biomol. Chem.* **2013**, *11*, 905-913. DOI: [10.1039/C2OB26329G](http://dx.doi.org/10.1039/C2OB26329G). (e) Farina, J. S.; Jackson, S. A.; Cummings, C. L. Synthesis of Analogs of Propranolol Hydrochloride. *Org. Prep. Proced. Int.* **1989**, *21*, 173-178. DOI: [10.1080/00304948909356363](https://sci-hub.tw/10.1080/00304948909356363). (f) Liu, Z. Z.; Chen, H. C.; Cao, S. L.; Li, R.T. A Novel Method for Synthesis of Aryl Glycidyl Ethers. *Synth. Commun.* **1994**, *24*, 833-838. DOI: [10.1080/00397919408011305](https://sci-hub.tw/10.1080/00397919408011305). (g) Hilf, J.; Frey, H. Propargyl-Functional Aliphatic Polycarbonate Obtained from Carbon Dioxide and Glycidyl Propargyl Ether. *Macromol. Rapid Commun.* **2013**, *34*, 1395-1400. DOI: 10.1002/marc.201300425. (h) Krushinski, J. H. Jr.; Schaus, J. M.; Thompson, D. C.; Calligaro, D. O.; Nelson, D. L.; Luecke, S. H.; Wainscott, D. B.; Wong, D. T. Indoloxypropanolamine analogues as 5-HT1A receptor antagonists. *Bioorg. Med. Chem. Lett*. **2007**, *17*, 5600-5604. DOI: [10.1016/j.bmcl.2007.07.086](https://doi.org/10.1016/j.bmcl.2007.07.086). [↑](#endnote-ref-2)
2. [?] Kwong, K. W.; Chen, T.; Luo, W.; Jeddi, H.; Zhang, R. A biomimetic oxidation catalyzed by manganese(III) porphyrins and iodobenzene diacetate: Synthetic and mechanistic investigations. *Inorganica Chim. Acta* **2015**, *430*, 176-183. DOI: 10.1016/j.ica.2015.03.003. [↑](#endnote-ref-3)
3. [?] Cleveland, A. H.; Fronczek, F. R.; Kartika, R. Synthesis of Vicinal Dichlorides via Activation of Aliphatic Terminal Epoxides with Triphosgene and Pyridine. *J. Org. Chem.* **2018**, *83*, 3367-3377. DOI: 10.1021/acs.joc.7b03197. [↑](#endnote-ref-4)
4. [?] Shen, C.; Guo, X.; Yu, J.; Zeng, X.; Peng, L.; Zhao, C.; Zhang, F. Synthesis of 2-(Phenoxymethyl)Oxirane Derivatives through Unexpected Rearrangement of Oxiran-2-Ylmethyl Benzenesulfonates. *Synth. Commun.* **2017**, *47*, 273-278. DOI: [10.1080/00397911.2016.1258579](https://sci-hub.tw/10.1080/00397911.2016.1258579). [↑](#endnote-ref-5)
5. [?] Forshaw, S.; Matthews, A. J.; Brown, T. J.; Diorazio, L. J.; Williams, L.; Wills, M. Asymmetric Transfer Hydrogenation of 1,3-Alkoxy/Aryloxy Propanones Using Tethered Arene/Ru(II)/TsDPEN Complexes. *Org. Lett.* **2017**, *19*, 2789-2792. DOI: 10.1021/acs.orglett.7b00756. [↑](#endnote-ref-6)
6. [?] Beaver, M. G.; Jamison, T. F. Ni(II) Salts and 2-Propanol Effect Catalytic Reductive Coupling of Epoxides and Alkynes. *Org. Lett.* **2011**, *13*, 4140-4143. DOI: 10.1021/ol201702a. [↑](#endnote-ref-7)
7. [?] Das, B.; Reddy, V. S.; Krishnaiah, M.; Rao, Y. K. Highly regio- and stereoselective ring-opening of epoxides and aziridines with sodium azide using ammonium-12-molybdophosphate. *J. Mol. Cat. A: Chem*. **2007**, *270*, 89-92. DOI: 10.1016/j.molcata.2007.01.040. [↑](#endnote-ref-8)
8. [?] Liu, H; Li, C.; Liu, H.; Liu, S. pH-Responsive Supramolecular Self-Assembly of Well-Defined Zwitterionic ABC Miktoarm Star Terpolymers. *Langmuir* **2009**, *25*, 4724-4734. DOI: 10.1021/la803813r. [↑](#endnote-ref-9)
9. [?] Sabitha, G.; Babu, R. S.; Rajkumar, M.; Yadav, J. S. Cerium(III) Chloride Promoted Highly Regioselective Ring Opening of Epoxides and Aziridines Using NaN3 in Acetonitrile: A Facile Synthesis of 1,2-Azidoalcohols and 1,2-Azidoamines. *Org. Lett*. **2002**, *4*, 343-345. DOI: 10.1021/ol016979q. [↑](#endnote-ref-10)
10. [?] Chen, X.; Wu, H.; Xu, R.; Liu, M.; Ding, J.; Su, W. Gallium Trichloride–Promoted Highly Regioselective Ring Opening of Epoxides with NH4SCN and NaN3 in Water. *Synth. Commun.* **2008**, *38*, 1855-1865. DOI: 10.1080/00397910801981540. [↑](#endnote-ref-11)
11. [?] Gungor, F. S.; Kiskan, B. One-pot synthesis of poly(triazole-graft-caprolactone) via ring-opening polymerization combined with click chemistry as a novel strategy for graft copolymers. *React. Funct. Polym.* **2014**, *75*, 51-55. DOI: [10.1016/j.reactfunctpolym.2013.12.005](https://doi.org/10.1016/j.reactfunctpolym.2013.12.005). [↑](#endnote-ref-12)
12. [?] Paul, S. Synthesis and Biological Evaluation of Alkaloids and Modified Nucleotide. PhD

    Thesis, University of Calcutta, **2012**. [↑](#endnote-ref-13)
13. [?] Hanessian, S.; Sakito, Y.; Dhanoa. D.; Baptistella, L. Synthesis of (+)-palitantin. *Tetrahedron* **1989**, *45*, 6623-6630. DOI: [10.1016/S0040-4020(01)89132-8](https://doi.org/10.1016/S0040-4020(01)89132-8). [↑](#endnote-ref-14)
14. [?] Tornøe, C. W.; Davis, P.; Porreca, F.; Meldal, M. α-Azido Acids for Direct Use in Solid-phase Peptide Synthesis. *J*. *Peptide Sci*. **2000**, *6*, 594-602. DOI: [10.1002/1099-1387(200012)6:12<594::AID-PSC276>3.0.CO;2-X](https://doi.org/10.1002/1099-1387(200012)6:12<594::AID-PSC276>3.0.CO;2-X). [↑](#endnote-ref-15)
15. [?] Chung, H.; Han, S; Chung, Y. K.; Park, J. H. Conversion of Primary Amines to Symmetrical Secondary and Tertiary Amines using a Co-Rh Heterobimetallic Nanocatalyst. *Adv. Synth. Catal.* **2018**, *360*, 1267-1272. DOI: [10.1002/adsc.201701522](https://doi.org/10.1002/adsc.201701522). [↑](#endnote-ref-16)
